# Supplementary material
Source: Springer Nature journal article supplement (https://www.springermedizin.de/resource/supplementary/12913_2013_2970_MOESM1_ESM.pdf/9532474)
Supplement: MOESM1 [file 9532474]

## Explore

What are the needs and how does the current service meet the needs?

## Generate

How can the needs be better met?

## Evaluate

How well do the new service concepts meet the needs?

Who?

What?

How?

Why?

When?

Where?
